# Supplementary material for: Development and internal validation of a prediction model for in-hospital mortality in trauma patients with high-energy pelvic fractures admitted to a single major trauma centre
Source: Research Square preprint supplement (doi:10.21203/rs.3.rs-8682842/v1), 2026-01-30
Supplement: Supplementary file 1 [file e959f4480056d52372b10157.docx]

**Supplementary File. Univariate logistic regression of potential predictors with outcome mortality**

| **Variable** | **Category** | **Odds Ratio (95% CI)** | **p-value** |
| --- | --- | --- | --- |
| Age |  |  |  |
|  | 15-34 years | Ref |  |
|  | 35-64 years | 0.62 (0.37-1.03) | 0.062 |
|  | 65 years | 2.53 (1.62-4.00) | **<**0.0001 |
| Sex |  |  |  |
|  | Female | Ref |  |
|  | Male | 1.10 (0.74-1.65) | 0.629 |
| Comorbidity |  |  |  |
|  | *Healthy | Ref |  |
|  | *Severe | 2.40 (1.54-3.73) | 0.006 |
| ISS |  |  |  |
|  | 13-24 | Ref |  |
|  | 25-49 | 5.18 (3.05-8.80) | **<**0.0001 |
|  | 50 | 22.82 (13.18-43.02) | **<**0.0001 |
| Trauma Type |  |  |  |
|  | Penetrating | Ref |  |
|  | Blunt | 1.14 (0.15-8.77) | 0.897 |
| Injury Mechanism |  |  |  |
|  | Pedal | Ref |  |
|  | Motor Vehicle | 1.33 (0.45-3.89) | 0.605 |
|  | Fall | 1.82 (0.61-5.44) | 0.279 |
|  | Pedestrian | 4.55 (1.60-12.94) | 0.005 |
|  | Motorcycle | 1.28 (0.40-4.08) | 0.672 |
|  | Other | 0.97 (0.25-3.72) | 0.969 |
| Intent |  |  |  |
|  | Accident | Ref |  |
|  | Intentional | 2.40 (1.42-4.08) | 0.001 |
| Scene Source |  |  |  |
|  | Transfer | Ref |  |
|  | Scene | 2.72 (1.36-5.43) | 0.005 |
| +Shock Index on Admission |  | 5.31 (3.61-7.81) | **<**0.0001 |
| +Hypothermia |  | 2.21 (1.36-3.59) | 0.001 |
| +Severe Pelvic Injury |  | 1.38 (0.93-2.03) | 0.060 |
| ASSOCIATED INJURIES |  |  |  |
| +Moderate Head |  | 1.21 (0.67-2.17) | 0.694 |
| +Severe Head |  | 8.89 (5.89-13.42) | **<**0.0001 |
| +Thoracic |  | 3.45 (2.32-5.14) | **<**0.0001 |
| +Abdominal |  | 2.56 (1.57-4.18) | **<**0.0001 |
| +Genitourinary/Ano-Rectal/Perineum |  | 1.26 (0.69-2.31) | 0.600 |

Ref - Reference

*The healthy category includes participants who are have no comorbidities and with non-limiting systemic illness. Severe comorbidity includes participants who have comorbidities that are limiting to normal activity and that pose a constant threat to life.

+Binary variables “yes/no” with reference category as “no”
